# Supplementary material for: Ice buttressing-controlled rock slope failure on a cirque headwall, English Lake District
Source: Copernicus journal article supplement (doi:10.5194/esurf-2023-14), 2023-04-26
Supplement: Supplementary file 1 [file esurf-2023-14-supplement.pdf]

# 1 Ice buttressing-controlled rock slope failure on a cirque headwall, 2 English Lake District

3 Paul A. Carling<sup>a, b</sup>, John D. Jansen<sup>c</sup>, Teng Su<sup>d, e</sup>, Jane L. Andersen<sup>f</sup>, Mads F. Knudsen<sup>f</sup>

4 <sup>a</sup> Geography & Environmental Science, University of Southampton, Southampton, SO17 1BJ, UK.

5 E-mail: P.A.Carling@soton.ac.uk

6 <sup>b</sup> Lancaster Environment Centre, Lancaster University, Bailrigg, Lancaster, LA1 4YW, UK.

7 <sup>c</sup> GFÚ Institute of Geophysics, Czech Academy of Sciences, Prague, Czechia

8 <sup>d</sup> University of Chinese Academy of Sciences, Beijing 100049, China.

9 <sup>e</sup> Laboratory of Water Cycle and Related Land Surface Processes, Institute of Geographical Sciences and Natural  
10 Resources Research, Chinese Academy of Sciences, Beijing, 100101, China.

11 <sup>f</sup> Department of Geoscience, Aarhus University, Aarhus, Denmark

## 12 13 Contents of this file

14 Figures S1, S2, Tables S1, S2. Here we present additional information regarding (1) the rock  
15 slope failure modelling and (2) the topographic shielding calculations for the cosmogenic  
16 nuclide data.

## 17 18 S1. Rock slope failure modelling

19 The simplest shear strength model applied to planar, clean discontinuities bounding a wedge  
20 of rock is the Mohr-Coulomb failure criterion:

$$21 \quad \tau_f = c_p + \sigma'_n \tan(\phi_p + r) \quad (S1)$$

22 where  $\tau_f$  is the shear strength of a given failure plane; here three discontinuities are  
23 recognized: a basal plane of failure and two lateral bounding planes;  $c_p$  and  $\phi_p$  are the  
24 cohesion and internal friction angle (e.g., 31°; Zhang, 2017, p. 196) of the discontinuity,  
25 respectively; and  $\sigma'_n$  is the effective normal stress on the failure plane. The effective  
26 roughness angle  $r$  is due to asperities, such as slickensides, on the otherwise smooth  
27 discontinuities; this value is implemented within *Swedge* using a waviness number ( $w = 7.9$ )  
28 derived using the procedure of Miller (1988). The primes for  $c_p$  and  $\phi_p$  have been omitted  
29 for brevity although they are for the effective stress conditions. In such a situation,  $c_p = 0$  for  
30 a non-sliding plane (Zhang, 2017, p. 285) whilst a value of 0.025 MPa is selected where  
31 surfaces are in contact. The latter value has been found to yield good results where  
32 discontinuities are clean (*i.e.*, no fillings) and there are no intact rock bridges across  
33 discontinuities (Rocscience Ltd., 2018). Equations 1 (main text) and S1 underpin the limit-  
34 equilibrium rock-slope stability approaches adopted within the *Swedge* version 6.0 software  
35 (2018) which is used here to determine the key levels of normal stress associated with the  
36 RSF. In the absence of published technical data for the Coniston Group applicable to the  
37 rock slope stability of an unfailed headwall of the cirque in the late Quaternary, it considered

38 that implementation of the *Swedge* model using field-derived data from the RSF will provide  
 39 valuable guidance with respect to the probable environmental conditions that pertained at  
 40 the time of failure.

41  
 42 The ratio of fall height ( $H$ ) and horizontal runout distance ( $L$ ) as a function of the RSF mass  
 43 volume has been used widely to identify rapid or slow RSFs. In the current context the  
 44 procedure of Whittall *et al.* (2017; their Eqs. 3 & 4) demonstrated that the RSF runout was  
 45 commensurate with a weak rock, whether the toe of the main rock wedge was taken as the  
 46 end of the runout, or if the additional rock debris below the wedge is taken as part of the  
 47 runout (Table S1). Although the runout is as expected for a weak unsupported rock mass  
 48 (Table S1), the lack of significant disruption of the strata within the thin wedge is surprising  
 49 and might point to a slow descent of the wedge.

50

51 **Table S1.** RSF mobility data

|                                                                              | Wedge without<br>debris extension at<br>base |         | Wedge with debris<br>extension at base |         | Mobility<br>ratio | Wedge<br>volume<br>without<br>debris <sup>1</sup> | Wedge<br>volume<br>with debris <sup>2</sup> |
|------------------------------------------------------------------------------|----------------------------------------------|---------|----------------------------------------|---------|-------------------|---------------------------------------------------|---------------------------------------------|
| <i>Parameter</i>                                                             | $H$ (m)                                      | $L$ (m) | $H$ (m)                                | $L$ (m) | $H/L$ (-)         | $V$ (M m <sup>3</sup> )                           | $V$ (M m <sup>3</sup> )                     |
| <i>Observed values</i>                                                       | 110                                          | 192     | 130                                    | 242     | 0.54-0.57         | 0.06825                                           | 0.07055                                     |
| <i>Expected values:</i><br>Whittall <i>et al.</i> , 2017<br>— weak bedrock   |                                              | 182     |                                        | 228     | 0.57-0.60         |                                                   |                                             |
| <i>Expected values:</i><br>Whittall <i>et al.</i> , 2017<br>— strong bedrock |                                              | 131     |                                        | 165     | 0.79-0.84         |                                                   |                                             |

52

53 <sup>1</sup> The volume of the main rock wedge was surveyed in the field.

54 <sup>2</sup> The volume of the additional rock debris was surveyed in the field (no correction for porosity).

55

56

## 57 **S2. Limitations of the cosmogenic surface exposure dating**

58

59 Although more rock samples for cosmogenic dating would have been preferable, preliminary  
 60 trials showed that the lithology was laborious to prepare for dating such that an unrealistic  
 61 resource would be required to date several rock samples. Because obtaining as precise a  
 62 date as possible was critical, we paid especial attention to topographic shielding, calculating  
 63 corrections for every 10° azimuth taking account of the inclination of the exposed surface,  
 64 as is detailed in section 3 (Fig. S1). The outer surface of the RSF, the riser, was  
 65 undisturbed and consequently replicate rock samples subject to the same sample

66 preparation and dating procedures as sample OSF would likely provide a range of dates not  
 67 dissimilar to that obtained:  $18 \pm 1.2\text{ka}$ .

68

69 Due to the friable nature of the bedrock, the RSF failure had resulted in disruption of the  
 70 basal failure plane surface which meant that much of the exposed failure plane was  
 71 unsuitable for sampling for cosmogenic dating. Sample HW was obtained from a relatively  
 72 undisturbed exposure of the failure plane behind the RSF. By making reasonable  
 73 assumptions about the rate of surface spalling of rock at the sampling site since the RSF  
 74 occurred, the date of sample HW ( $12 \pm 0.8\text{ka}$ ) could be related to the original exposure date  
 75 of the outer surface of the riser as is detailed in section 3 (Fig. S2).

76

### 77 **S3. Cosmogenic surface exposure dating**

78

79 **Table S2.** Topographic shielding field measurements. For samples OSF and HW, the  
 80 shielding factor is calculated to be 0.580546, and 0.742680, respectively.

| Sample OSF <sup>1</sup> |                        | Sample HW <sup>2</sup> |                        |
|-------------------------|------------------------|------------------------|------------------------|
| <i>Azimuth</i> (°)      | <i>Inclination</i> (°) | <i>Azimuth</i> (°)     | <i>Inclination</i> (°) |
| 0                       | 1.7                    | 0                      | 1.4                    |
| 9                       | 1.3                    | 10                     | 2.5                    |
| 21                      | 2.1                    | 20                     | 1.5                    |
| 30                      | 2.9                    | 30                     | 1.2                    |
| 40                      | 3.6                    | 40                     | 1.7                    |
| 50                      | 4.8                    | 50                     | 1.8                    |
| 60                      | 4.8                    | 60                     | 2.2                    |
| 70                      | 3                      | 70                     | 2.2                    |
| 80                      | 3                      | 80                     | 2.2                    |
| 90                      | 3                      | 90                     | 2.1                    |
| 100                     | 2.3                    | 100                    | 1.9                    |
| 114                     | 10.6                   | 110                    | 2.8                    |
| 122                     | 12.1                   | 120                    | 5                      |
| 132                     | 17.5                   | 130                    | 15.2                   |
| 138                     | 30.8                   | 140                    | 39.5                   |
| 167                     | 58                     | 150                    | 48                     |
| 170                     | 60.5                   | 160                    | 55.7                   |
| 180                     | 63                     | 170                    | 62.5                   |
| 196                     | 83                     | 187                    | 68                     |
| 216                     | 65.5                   | 200                    | 43.5                   |
| 231                     | 52.5                   | 210                    | 42.7                   |
| 250                     | 34.7                   | 230                    | 41                     |
| 269                     | 25.4                   | 240                    | 40.1                   |
| 279                     | 22.3                   | 250                    | 33.2                   |
| 295                     | 17.5                   | 260                    | 27.5                   |

|     |     |     |      |
|-----|-----|-----|------|
| 303 | 12  | 270 | 21.3 |
| 312 | 6.1 | 280 | 20.3 |
| 325 | 5.1 | 290 | 12.5 |
| 337 | 3.7 | 315 | 0    |
| 343 | 2.1 | 320 | 0.7  |
| 350 | 0.8 | 330 | 0.5  |
|     |     | 340 | 0.4  |
|     |     | 350 | 1.1  |

81 <sup>1</sup> sample surface dips 83°, strikes 286°

82 <sup>2</sup> sample surface dips 68°, strikes 277°.

83

84 *Online topographic shielding calculator results for sample OSF (upper) and HW (lower)*

Shielding factor: 0.580546

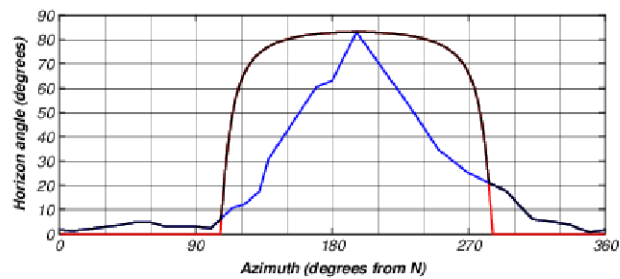

[GMT Postscript](#)

The blue line is the far-field horizon; red is the near-field horizon implied by the surface dip; black is the combined horizon. If you can't see any blue or red, it's under the black line.

85

Shielding factor: 0.742680

This plot is mainly just to check that you entered the data correctly.

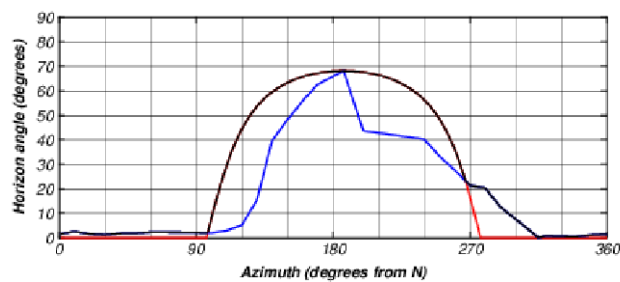

86

87

88

89 **Figure S1.** Topographic shielding calculated using the 'Topographic Shielding Calculator v.2'

90 ([http://stoneage.ice-d.org/math/skyline/skyline\\_in.html](http://stoneage.ice-d.org/math/skyline/skyline_in.html)) based on field measurements for

91 sample OSF (top panel) and HW (lower panel) given in Table S2. The diagrams show the

92 portion of the skyline shielded by distal topography (blue) and resulting from the dip of the

93 sampled surface itself (red), with total shielding shown in black. The resulting topographic

94 shielding factors (numbers between 0 and 1) are multiplied with the calibrated site production  
95 rates to get the effective  $^{10}\text{Be}$  production rate at our sites.  
96  
97  
98  
99

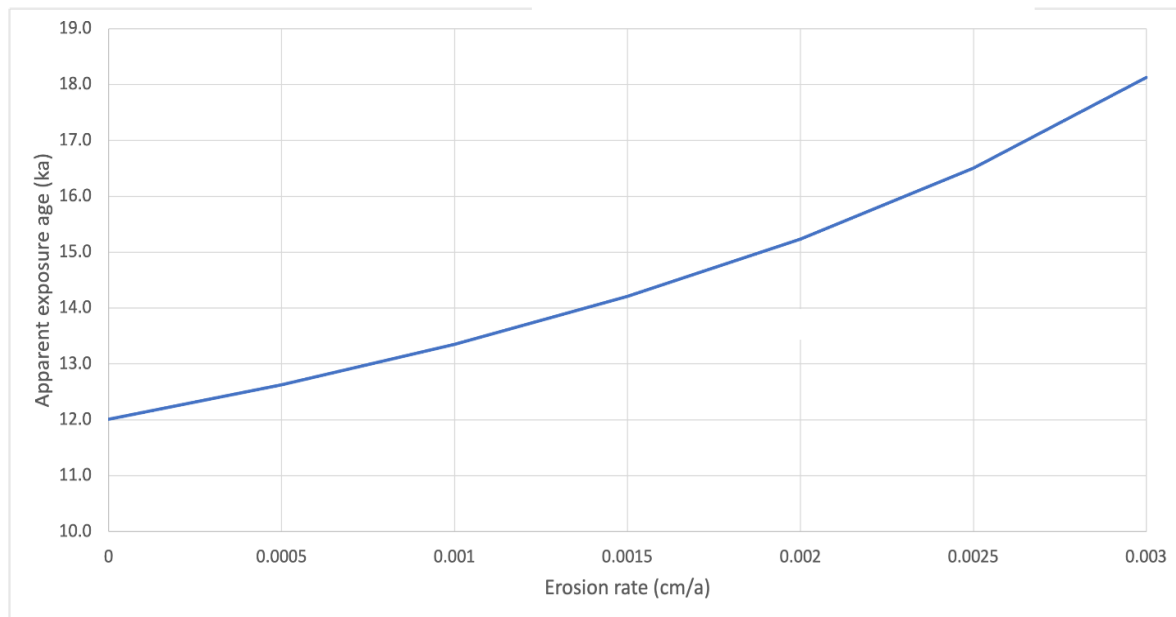

**Figure S2.** Combinations of apparent exposure ages and erosion rates consistent with the cosmogenic  $^{10}\text{Be}$  inventory measured in sample HW. Surface erosion affects the abundance of cosmogenic nuclides and the estimated exposure age; we address this issue in the Discussion of the main text. We expect that the surface spalling led to loss of 10 to 20 cm thick blocks from the rock surface. This plot illustrates the case of an average erosion rate of 0.003 cm/yr at the HW sample site, which would be sufficient to allow samples HW and OSF to have the same exposure age (~18 ka).

### Supplementary References

Zhang, L., 2017 Engineering Properties of Rocks (2<sup>nd</sup> Edition), Elsevier, 378pp.
